# Supplementary material
Source: Springer Nature journal article supplement (https://www.springermedizin.de/resource/supplementary/12936_2010_1727_MOESM1_ESM.pdf/9541560)

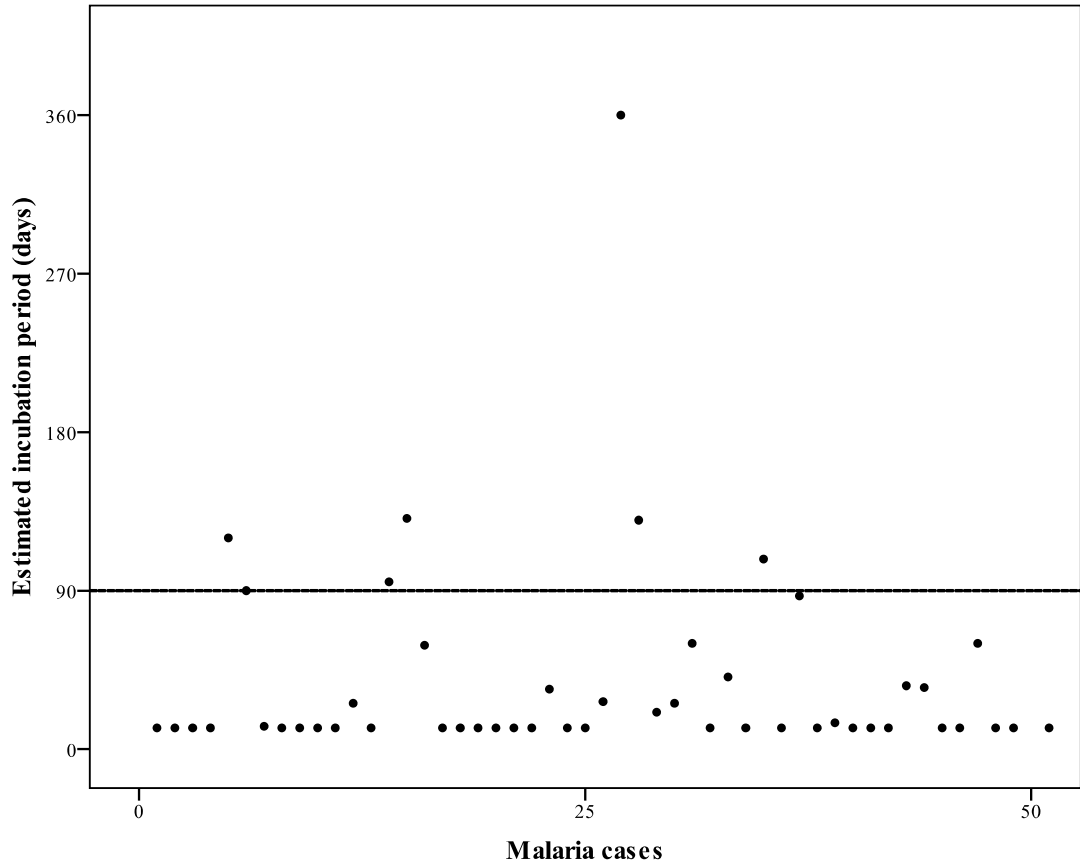

Supplement: MOESM1 [file 9541560]
